# Enhancement of Spinal N-Methyl-D-aspartate Receptor Function by Remifentanil Action at $\delta$ -Opioid Receptors as a Mechanism for Acute Opioid-induced Hyperalgesia or Tolerance

Min Zhao, M.Sc.,\* Daisy T. Joo, M.D., Ph.D., C.I.P., F.R.C.P.(C.)†

**Background:** Intraoperative remifentanil infusions have been associated with postoperative opioid-induced hyperalgesia and tolerance. Using a previously identified subpopulation of spinal neurons that displays an augmentation in N-methyl-D-aspartate (NMDA) receptor current after chronic morphine, investigations were undertaken to determine whether remifentanil induces acute increases in NMDA responses that are concentration dependent and receptor subtype dependent.

**Methods:** Electrophysiologic recordings of NMDA current were made from cultured rat dorsal horn neurons treated with remifentanil at various concentrations for 60 min. Selective  $\mu$ - or  $\delta$ -opioid receptor inhibitors and agonists were used to determine the site of action of remifentanil.

**Results:** Remifentanil at 4, 6, and 8 nM, but not higher or lower concentrations, caused significant mean increases in NMDA peak current amplitude of 37.30% ( $P < 0.001$ ), 30.19% ( $P < 0.001$ ), and 23.52% ( $P = 0.025$ ), respectively, over control conditions. This occurred by 36 min of remifentanil perfusion and persisted throughout its washout. Inhibition by 100 nM naloxone or 1 nM naltrindole attenuated the remifentanil-induced NMDA response increase. Selective  $\delta$ -opioid agonists [D-Pen<sup>2</sup>, D-Pen<sup>5</sup>]enkephalin and deltorphin II displayed a similar bell-shaped concentration–response relation for the enhancement of NMDA responses, and 10 nM deltorphin II occluded the effects of 4 nM remifentanil on NMDA responses.

**Conclusions:** Clinically relevant concentrations of remifentanil induce rapid, persistent increases in NMDA responses that

mirror the development of remifentanil-induced hyperalgesia and tolerance. NMDA enhancement by remifentanil is dependent on the activation of both  $\mu$ - and  $\delta$ -opioid receptors and is inducible solely by  $\delta$ -opioid receptor activation. Therefore, selective  $\delta$ -opioid inhibition may attenuate acute paradoxical increases in pain and tolerance to opioids.

OPIOID administration has been associated with the development of paradoxical, pathologic pain that presents as opioid-induced hyperalgesia (OIH) or tolerance. Although the prevalence of these states among patients treated with opioids remains unknown, hyperalgesia and tolerance seem to occur more frequently and predictably with the administration of the potent, short-acting opioid remifentanil.<sup>1-7</sup> Remifentanil is primarily a  $\mu$ -opioid receptor agonist that causes antinociception or analgesia by activating receptor-associated G<sub>i/o</sub> proteins.<sup>8,9</sup> But similar to other opioids, remifentanil may also have activity at other subtypes of opioid receptors.<sup>10</sup>

Perioperative trials have reported the existence of remifentanil-induced tolerance as measured by an increase in postoperative morphine requirements for adequate analgesia.<sup>2-4</sup> As well, studies in human volunteers<sup>1,5-7</sup> and surgical patients<sup>4</sup> that used standardized response measures demonstrate the presence of hyperalgesia or allodynia and tolerance after a 60- to 90-min remifentanil intravenous infusion at rates between 0.05–0.3  $\mu\text{g} \cdot \text{kg}^{-1} \cdot \text{min}^{-1}$ . Acute OIH associated with remifentanil occurs rapidly and, consequently, offers a unique opportunity for a real-time study of the cellular changes underlying its development.

A pharmacologic study of remifentanil distribution in dogs during intravenous administration has revealed a high penetration of the drug into cerebrospinal fluid, equal to 74% of venous levels.<sup>11</sup> Therefore, pharmacodynamic effects of remifentanil in the spinal cord are relevant for the study of mechanisms underlying the development of opioid-induced increases in pain response.

Pain signaling propagates through the spinal cord by glutamatergic neurotransmission involving the N-methyl-D-aspartate (NMDA) subtype of glutamate receptors. These receptors are located postsynaptically and extrasynaptically in the membrane of dorsal horn (DH) neurons and are activated by the presynaptic release of glutamate from nerve terminals of dorsal root ganglia cells depolarized by pain-provoking mechanical or chemical stimuli. Upon activation, NMDA receptors fa-

Additional material related to this article can be found on the ANESTHESIOLOGY Web site. Go to <http://www.anesthesiology.org>, click on Enhancements Index, and then scroll down to find the appropriate article and link. Supplementary material can also be accessed on the Web by clicking on the "ArticlePlus" link either in the Table of Contents or at the top of the Abstract or HTML version of the article.

\* Technician, Program in Neurosciences and Mental Health, Research Institute, The Hospital for Sick Children. † Assistant Professor, Department of Anesthesia, Program in Neurosciences and Mental Health, Research Institute, The Hospital for Sick Children; Department of Anesthesia, University of Toronto.

Received from The Department of Anesthesia, and Program in Neurosciences and Mental Health, Research Institute, The Hospital for Sick Children, Toronto, Ontario, Canada, and The Department of Anesthesia, University of Toronto, Toronto, Ontario, Canada. Submitted for publication September 28, 2007. Accepted for publication April 3, 2008. Supported by The Hospital for Sick Children Foundation, Toronto, Ontario, Canada, and the University of Toronto, Toronto, Ontario, Canada, through the Dean's Fund New Staff Grant awarded to Dr. Joo. Presented in part at the 63rd Canadian Anesthesiologists' Society Annual Meeting, Calgary, Alberta, Canada, June 22–26, 2007, and in whole at the 64th Canadian Anesthesiologists' Society Annual Meeting, Richard Knill Competition, Halifax, Nova Scotia, Canada, June 13–17, 2008.

Address correspondence to Dr. Joo: Department of Anesthesia, Program in Neurosciences and Mental Health, Research Institute, The Hospital for Sick Children, 555 University Avenue, Room 5013C, Toronto, Ontario, M5G 1X8, Canada. [daisy.joo@yahoo.com](mailto:daisy.joo@yahoo.com). Information on purchasing reprints may be found at [www.anesthesiology.org](http://www.anesthesiology.org) or on the masthead page at the beginning of this issue. ANESTHESIOLOGY's articles are made freely accessible to all readers, for personal use only, 6 months from the cover date of the issue.

cilitate the influx of cations, such as  $\text{Na}^+$  and  $\text{Ca}^{2+}$ , causing the DH neurons to depolarize and fire action potentials, resulting in a further release of glutamate and propagation of the pain signal from neuron to neuron through the spinal cord to the brain.

At many points in this pathway, the pain signal can be pathologically augmented. In particular, the enhancement of NMDA receptor function in DH neurons may underlie increased pain states in chronic pain and OIH.<sup>12-15</sup> Many behavioral studies have reinforced a role for NMDA receptor antagonism in the prevention of OIH and tolerance.<sup>12</sup> As well, *in vitro* study of spinal cord neurons showed NMDA current enhancement by  $1\ \mu\text{M}$  [D-Ala<sup>2</sup>, N-McPhe<sup>4</sup>, Gly<sup>5</sup>-ol]enkephalin (DAMGO) is mediated by increases in intracellular protein kinase C (PKC).<sup>16,17</sup> This series of studies concluded that  $\mu$ -opioid receptor activation resulted in NMDA receptor enhancement despite more recent recognition that  $1\ \mu\text{M}$  DAMGO also activates other opioid receptor subtypes, such as the  $\delta$ -opioid receptor.<sup>18</sup> It is unknown whether selective  $\delta$ -opioid receptor activation induces an enhancement of NMDA receptor function.

In the spinal cord,  $\mu$ - and  $\delta$ -opioid receptors like NMDA receptors are also primarily located postsynaptically in some DH neurons, specifically excitatory interneurons. These subtypes of opioid receptors colocalize with NMDA receptors.<sup>19-22</sup> This laboratory previously<sup>23</sup> identified a subpopulation of DH neurons in which the coincident activation of opioid and NMDA receptors enhance the function of NMDA receptors.

Therefore, using electrophysiologic studies of NMDA receptor-mediated responses from cultured rat DH neurons that were untreated and treated with remifentanil, it was questioned (1) whether NMDA receptor function in spinal cord DH neurons is modulated acutely by remifentanil, (2) whether this effect is concentration and time dependent, and (3) whether the activation of  $\delta$ -opioid receptors contributes to the remifentanil-induced enhancement of NMDA responses.

## Materials and Methods

Experimental protocols were approved by the Animal Care Committee at the Lab Animal Services Department of the Hospital for Sick Children, Toronto, Ontario, Canada. All chemicals used in these experiments were obtained from Sigma-Aldrich Canada Ltd. (Oakville, Ontario, Canada) unless otherwise stated.

### Cell Culture

Primary DH neuron cultures were prepared as previously described.<sup>23</sup> In short, Timed-pregnant female Wistar rats (Charles River, Wilmington, MA) were killed by cervical dislocation after inhalational general anesthesia with halothane, and their fetuses (E18-19 days) were re-

moved. The fetuses were decapitated, and their spinal cords were surgically extracted by an anterior approach and placed in recently thawed Hanks solution. After carefully stripping the meninges, each spinal cord was laid open by a longitudinal incision along the dorsal commissure down through the central canal. This allowed the dissection of the dorsal half of the cord by cutting along the lateral funiculus bilaterally. The dorsal halves of the spinal cords were pooled, minced, and incubated in Hanks solution containing 0.25% trypsin (Invitrogen Canada Inc., Burlington, Ontario, Canada) at 37°C for 45 min. Subsequently, the tissue was washed, mechanically triturated, and plated in Minimum Essential Medium (Invitrogen) containing 10% fetal bovine serum (Invitrogen), 10% horse serum (Invitrogen), and 1 U/ml insulin (Novo Nordisk Canada Inc., Mississauga, Ontario, Canada). The tissue from seven spinal cords was used for primary culture of 10 collagen-coated 35-mm Nalgene dishes (Fisher Scientific Co., Ottawa, Ontario, Canada). After 6 days of incubation, the dishes were treated for 24 h with 13  $\mu\text{g}/\text{ml}$  5'-fluoro-2-deoxyuridine and 33  $\mu\text{g}/\text{ml}$  uridine. Beyond 6 days of incubation, the culture media contained Minimum Essential Media with 10% horse serum only.

Because of developmental changes in the subunit composition of NMDA receptors<sup>24</sup> that affect NMDA-evoked current amplitudes and desensitization,<sup>25-28</sup> all electrophysiologic recordings were undertaken in the DH neurons after 14-21 days of incubation when mature complements of NMDA receptors are expressed.

### Electrophysiologic Recording

All electrophysiologic recordings were made at room temperature (20°-22°C). Patch electrodes were pulled from thin-walled borosilicate glass (1.5-mm OD; World Precision Instruments, Sarasota, FL) using a two-stage vertical puller (Narashige PP-830; Tokyo, Japan) with a series resistance of 3-8 M $\Omega$ . Whole cell potentials and currents were recorded using the Multiclamp 700A amplifier (Axon Instruments Inc., Union City, CA), and data were filtered (2 kHz), digitized using the Digidata 1322A (Axon Instruments Inc.), and acquired on-line at a sampling frequency of 10 kHz using the pCLAMP8 program (Axon Instruments Inc.).

Tonic-firing, small-sized DH neurons with capacitance less than 22 pF were previously shown to have an increased likelihood for the coexpression of NMDA and opioid receptors by demonstrating enhanced NMDA-evoked current amplitude after chronic morphine treatment.<sup>23</sup> Therefore, only DH neurons with these electrophysiologic properties were used in this study.

### Determination of Firing Pattern

Recording electrodes were filled with intracellular solution consisting of 140 mM KCl, 10 mM HEPES, 2 mM  $\text{MgCl}_2$ , 10 mM EGTA, and 4 mM MgATP. This solution was

buffered to a pH of 7.4 using KOH, and the osmolality was adjusted to 290–300 mOsm. Culture media from dishes of DH neurons were gently replaced with an extracellular recording solution containing 140 mM NaCl, 1.3 mM CaCl<sub>2</sub>, 5.4 mM KCl, 25 mM HEPES, and 33 mM glucose, buffered to a pH of 7.4 with NaOH and adjusted to an osmolality of 320–325 mOsm.

Cultured DH neurons were initially patched and voltage clamped at a holding potential of  $-60$  mV. Stability was determined by a small and unchanging leak current between 0 and  $-100$  pA. The head stage was then changed to the current clamp configuration, and the firing pattern, in response to a previously described current injection protocol,<sup>23</sup> was determined for each neuron. Briefly, the resting membrane potential was recorded, and firing patterns were determined in response to hyperpolarizing and depolarizing current injections (50 pA steps from  $-200$  to  $+350$  pA) at 500-ms intervals. Only tonic-firing, rather than phasic-firing, neurons that maintained a small leak current and looked healthy under light microscopy were further studied under voltage clamp.

#### Determination of Neuronal Size

To determine the size of neurons, membrane capacitance was estimated from the area under the capacitance transient evoked by a hyperpolarizing 10-mV step. Only cultured DH neurons with tonic firing patterns and membrane capacitances less than 22 pF were retained for further study.

The hyperpolarizing step was made approximately 150 ms before each recording of an NMDA-evoked current. All current amplitudes were normalized to cell membrane capacitance to ensure the uniformity of comparisons, which was based on current density, irrespective of cell size.

#### NMDA Current Recordings with or without Remifentanyl

At a holding potential of  $-60$  mV, the selected DH neurons were perfused continuously with the extracellular solution containing 3  $\mu$ M glycine and 0.3  $\mu$ M tetrodotoxin. This solution was delivered *via* a three-barrel capillary tube system with each barrel attached to a 7-ml reservoir, the height of which was adjusted to deliver solutions at a rate of 1 ml/min. Rapid exchange of solutions ( $\tau$  = approximately 3 ms) between barrels by lateral movement of the capillary tube system was achieved using the SF-77BLT Perfusion Fast-Step (Warner Instruments Corp., Hamden, CT) and allowed exposure of the neuron to a 1-s application of NMDA at a saturating concentration of 1 mM.<sup>23</sup> NMDA-evoked currents were recorded at 15-min intervals with 2 min between applications before, during, after remifentanyl (Ultiva®; Abbott Laboratories Ltd., Montreal, Quebec, Canada) co-perfusion at 0, 1, 2, 4, 6, 8, and 10 nM concentrations

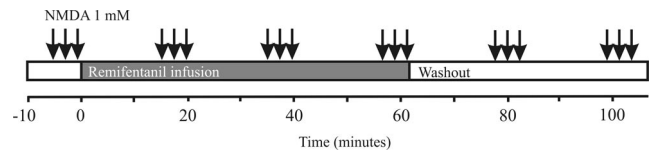

**Fig. 1.** The application protocol for extracellular remifentanyl is shown (in gray) during whole cell voltage clamp recordings of *N*-methyl-D-aspartate (NMDA) receptor-mediated current in cultured rat dorsal horn neurons. NMDA at 1 mM was applied to the neurons every 2 min (for 3–5 responses) at 15-min intervals before, during, and after remifentanyl perfusion.

using the protocol shown in figure 1. Therefore, each recording interval was approximately 20 min in duration, and there were a total of five to six recording intervals per experiment after baseline NMDA current acquisition.

The vehicle of the pharmaceutical preparation of remifentanyl (Ultiva®) contains 3 mM glycine per 50  $\mu$ M remifentanyl.<sup>29</sup> At this concentration but not at 10  $\mu$ M, glycine directly gates NMDA receptors in rat spinal cord slice recordings,<sup>29</sup> where neurons are studied in the presence of ambient glutamate. The remifentanyl concentrations (1, 2, 4, 6, 8, and 10 nM) applied in these experiments are similar to the plasma levels in human subjects given an infusion of remifentanyl intravenously for analgesia. At this concentration, the vehicle contains only 0.06, 0.12, 0.24, 0.36, 0.48, and 0.60  $\mu$ M glycine, respectively. These concentrations of glycine are unlikely to potentiate NMDA receptor function through direct activation, coactivation, or receptor trafficking.<sup>30</sup> Extracellular solutions used routinely in our laboratory and most others for NMDA receptor current recordings contain 3  $\mu$ M glycine and do not enhance peak current amplitudes during the recording session (1.5–2 h). Therefore, the remifentanyl, other agonist/antagonist, and control perfusion solutions were adjusted to contain uniformly 3  $\mu$ M glycine for all experiments performed.

*N*-Methyl-D-aspartate-evoked maximal current amplitudes were measured using pCLAMP (Axon Instruments), and the data were plotted using GraphPad Prism (Graph Pad, San Diego, CA). Only DH neurons surviving beyond 67 min of electrophysiologic recording were retained for analysis.

The  $\mu$ - and  $\delta$ -opioid receptor inhibitors 100 nM naloxone and 1 nM naltrindole, respectively, were perfused in the presence or absence of 4 nM remifentanyl to determine the site of action of remifentanyl for inducing NMDA enhancement. Agonist experiments using selective  $\delta$ -opioid receptors agonists [D-Pen<sup>2</sup>, D-Pen<sup>5</sup>]enkephalin (DPDPE) at 4, 12, and 30 nM and deltorphin II at 4, 10, and 30 nM were performed under the same recording conditions as remifentanyl. At these concentrations of DPDPE and deltorphin II, the agonist is selective for  $\delta$ -opioid receptor activation and is inactive at the  $\mu$ -opioid receptor.<sup>18</sup>

### Statistical Analyses

All results were reported as mean  $\pm$  SEM. Data were analyzed using SigmaStat 3.11 (SYSTAT Software Inc., San Jose, CA). The mean NMDA peak and steady state amplitudes, measured in control and various concentrations of remifentanil-treated neurons, were compared using a two-way analysis of variance, unless otherwise stated. A Tukey posttest was used to compare all treatment groups with the naive control group. Significance was reported at  $P < 0.05$ .

## Results

### Acute and Prolonged NMDA Receptor Enhancement in Relatively Low-dose Remifentanil-treated DH Neurons

Many recent studies indicate that opioids increase NMDA receptor activity in DH neurons of the spinal cord.<sup>12-15</sup> However, no studies have demonstrated that the rapidity by which an opioid, such as remifentanil, increases NMDA receptor function directly correlates with its ability to induce acute hyperalgesia and tolerance in a clinical setting. Therefore, NMDA receptor responses in DH neurons before, during, and after a 60-min perfusion of remifentanil were investigated. In particular, the time course for the development of NMDA receptor response enhancement and the concentrations of remifentanil that caused this increase were noted.

### Remifentanil Concentration Dependence of Remifentanil-induced Enhanced NMDA Responses

N-Methyl-D-aspartate-evoked recordings in the subset of small, tonic-firing DH neurons showed a significant increase in peak current amplitude of NMDA responses after 60 min of 4 nM remifentanil perfusion (fig. 2). These enhanced NMDA responses persisted during remifentanil washout. NMDA-evoked recordings from remifentanil-treated neurons were compared with responses from a similar subset of DH neurons grown in sister cultures not exposed to remifentanil (naive controls), which revealed a progressive decline in the amplitude (fig. 2B) or "rundown" of the peak current known to occur under these recording conditions.<sup>31</sup> In contrast to a previous study using a recombinant expression system,<sup>32</sup> there was no evidence of direct NMDA receptor gating by remifentanil in this study.

The NMDA peak current densities were normalized to the baseline values recorded during the first 10 min of recording. Baseline NMDA peak current densities were not significantly different between the naive control and 1, 2, 4, 6, 8, and 10 nM remifentanil-treated neurons ( $53.16 \pm 7.84$ ,  $55.18 \pm 9.22$ ,  $60.95 \pm 3.20$ ,  $52.35 \pm 5.24$ ,  $43.43 \pm 4.17$ ,  $49.98 \pm 3.12$ , and  $54.58 \pm 8.17$  pA/pF, respectively; one-way analysis of variance,  $P = 0.55$ ).

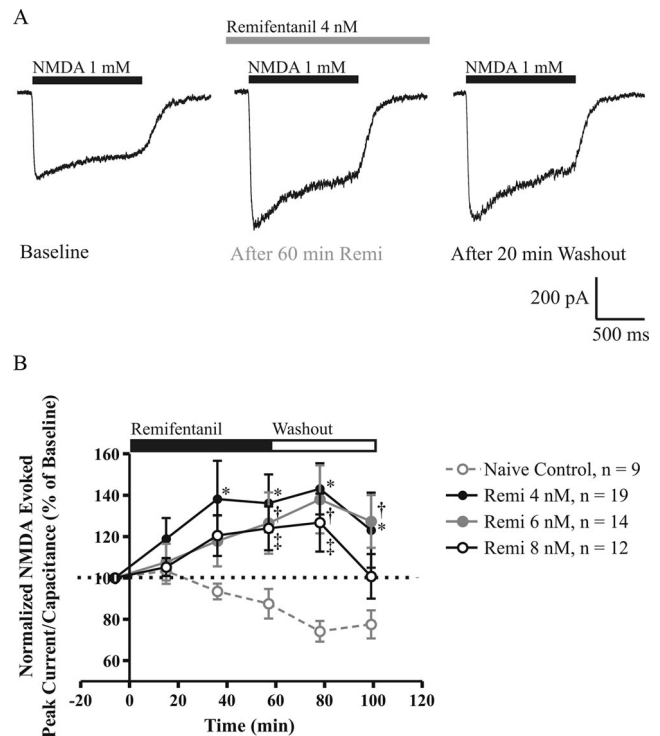

**Fig. 2.** N-Methyl-D-aspartate (NMDA)-evoked current responses in control and 4 nM remifentanil-treated dorsal horn neurons. (A) Representative current traces in response to 1 mM NMDA recorded from a selected dorsal horn neuron before, during, and after treatment with 4 nM remifentanil (Remi). (B) Peak NMDA-evoked current amplitude per unit cell capacitance normalized to baseline responses recorded immediately before the start of the remifentanil infusion at concentrations of 4 nM (Remi 4 nM; black closed circles), 6 nM (Remi 6 nM; gray closed circles), and 8 nM (Remi 8 nM; black open circles) compared with naive controls (gray open circles). Significant increases in NMDA peak current amplitude occurred with remifentanil exposure at these concentrations. Mean differences from naive controls ( $n = 9$ ) were 37.30% ( $n = 19$ ) (\*  $P < 0.001$ , two-way analysis of variance with Tukey posttest), 30.19% ( $n = 14$ ) (†  $P < 0.001$ , two-way analysis of variance with Tukey posttest), and 23.52% ( $n = 12$ ) (‡  $P = 0.025$ , two-way analysis of variance with Tukey posttest), respectively.

Remifentanil at 4, 6, and 8 nM caused increases in NMDA currents of 37.30, 30.19, and 23.52% compared with time-matched naive controls ( $P < 0.001$ ,  $P < 0.001$ , and  $P = 0.025$ , respectively; fig. 2B). No significant effect was observed at any of the other concentrations of remifentanil (figs. 3A and B).

### Time Dependence of Remifentanil-induced Enhanced NMDA Responses

Because repetitive activations of NMDA receptors may hasten cellular demise,<sup>33</sup> exposure to NMDA was limited by reducing the number of applications to three per 20-min interval of remifentanil or control extracellular perfusion. This enabled us to record from the DH neurons for at least 120 min. The increases in NMDA peak current amplitude to 4 nM remifentanil are significant as early as 36 min after the start of remifentanil perfusion (fig. 2B). In two cells exposed to 4 nM remifen-

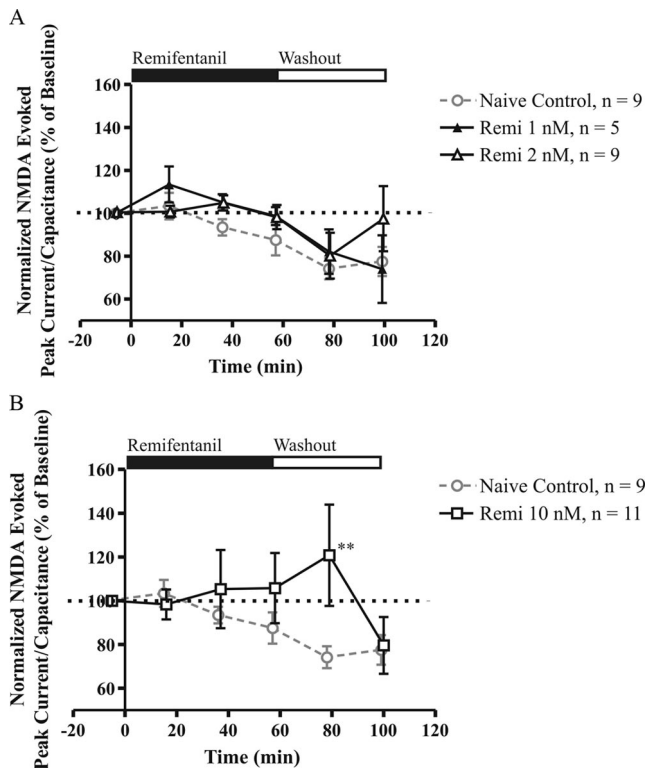

**Fig. 3.** (A) *N*-Methyl-D-aspartate (NMDA)-evoked peak current amplitude per unit cell capacitance normalized to baseline responses recorded immediately before the start of the remifentanyl infusion at concentrations of 1 nM (Remi 1 nM; black closed triangles) and 2 nM (Remi 2 nM; black open triangles) compared with naive controls (gray open circles). Mean differences from control were 6.20% ( $n = 5$ ) and 7.15% ( $n = 9$ ), respectively. (B) Peak NMDA-evoked current amplitude per unit cell capacitance normalized to baseline responses recorded immediately before the start of the remifentanyl infusion at a concentration of 10 nM (Remi 10 nM; black open squares) compared with naive controls (gray open circles) with a mean difference of 12.28% ( $n = 11$ ). None of the treatments at these remifentanyl concentrations caused NMDA-evoked current peak amplitude to change significantly ( $P > 0.05$ , two-way analysis of variance). With the washout of 10 nM remifentanyl, there was a transient increase in NMDA peak response (\*\* $P = 0.043$ , Student *t* test).

tanyl in which NMDA was applied every 2 min, recording times were limited to 60 and 80 min, respectively. Enhanced NMDA peak responses were seen starting at approximately 20–30 min (data not shown). Therefore, NMDA peak current amplitude increases during 4, 6, and 8 nM remifentanyl exposure occurring rapidly (by 57 min) after the onset of opioid perfusion.

This NMDA response enhancement persists for at least 40 min after washout of remifentanyl (fig. 2B). Interestingly, there are significant increases in the peak NMDA response during the first 20-min interval washout of 10 nM remifentanyl (fig. 3B), during which the neurons are subjected to lower concentrations of remifentanyl existing in the culture dish. The insignificant increases in NMDA current after 10 nM remifentanyl and this washout effect are consistent with an inhibition and rebound of the NMDA receptor enhancement by relatively lower opioid concentrations. These results demonstrate remifen-

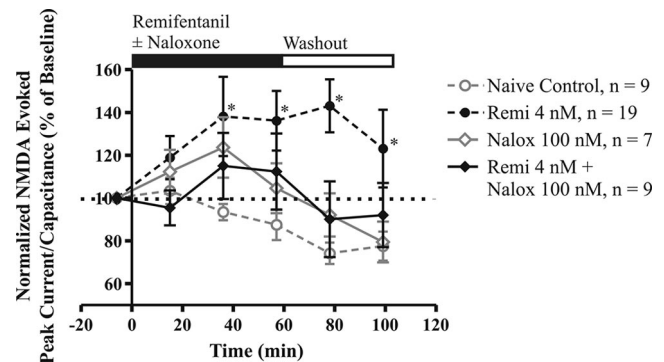

**Fig. 4.** *N*-Methyl-D-aspartate (NMDA)-evoked peak current amplitude per unit cell capacitance normalized to baseline responses during and after 4 nM remifentanyl without (Remi 4 nM; black closed circles) or with (Remi 4 nM + Nalox 100 nM; black closed diamonds) coperfusion of 100 nM naloxone. Data from recordings undertaken in control dorsal horn neurons perfused with 100 nM naloxone alone are also shown (Nalox 100 nM; gray open diamonds). There were no significant differences in the peak amplitude of the NMDA-evoked current responses when 100 nM naloxone was added to control and remifentanyl-treated neurons when compared with naive controls (gray open circles). Only 4 nM remifentanyl-treated neurons demonstrated an increase in NMDA-evoked peak current compared with naive controls (\* $P < 0.001$ , two-way analysis of variance with Tukey posttest).

tanyl concentration and time dependence of the enhanced NMDA responses *in vitro* that correlate with and may underlie remifentanyl-induced hyperalgesia.

#### *NMDA Receptor Enhancement in Remifentanyl-treated DH Neurons Inhibited by $\mu$ - and $\delta$ -Opioid Receptor Inhibitors*

Activation of  $\mu$ - and  $\delta$ -opioid receptors, but not  $\kappa$ -opioid receptors, has been implicated in the development of opioid-induced hyperalgesia,<sup>34</sup> possibly due to their effect on certain intracellular G proteins.<sup>35</sup> The ability of the  $\mu$ -opioid antagonist naloxone at 100 nM or the  $\delta$ -opioid antagonist naltrindole at 1 nM to attenuate the remifentanyl-induced enhancement of NMDA responses was tested by coperfusion of these antagonists with remifentanyl. Naloxone at 100 nM attenuated the increases in NMDA peak current during perfusion and washout of 4 nM remifentanyl (fig. 4). Control recordings demonstrated that, in the absence of remifentanyl, naloxone does not significantly influence NMDA currents (fig. 4). Similarly, selective  $\mu$ -opioid receptor inhibition by 1 nM naloxonazine abolished the NMDA response enhancement to 4 nM remifentanyl (data not shown; fig. 1 on the ANESTHESIOLOGY Web site at <http://www.anesthesiology.org>). Selective  $\delta$ -opioid inhibition by 1 nM naltrindole also completely attenuated the increases in NMDA peak current due to 4 nM remifentanyl, and even at a higher concentration, 1  $\mu$ M naltrindole did not alter NMDA current in the absence of remifentanyl (fig. 5). Therefore,  $\mu$ - and  $\delta$ -opioid receptor inhibition independently attenuated the remifentanyl-induced increases in NMDA responses, which suggest that these opioid re-

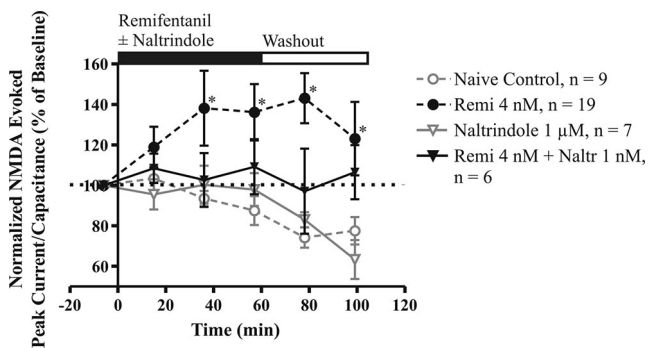

**Fig. 5.** *N*-Methyl-D-aspartate (NMDA)–evoked peak current amplitude per unit cell capacitance normalized to baseline responses during and after 4 nM remifentanil without (Remi 4 nM; black closed circles) or with (Remi 4 nM + Naltr 1 nM; black closed inverted triangles) coperfusion of 1 nM naltrindole. Data from recordings undertaken in control dorsal horn neurons perfused with 1 μM naltrindole alone are also shown (gray open inverted triangles). There are no significant differences in the peak amplitude of the NMDA-evoked current responses with 1 μM naltrindole added to control and 1 nM naltrindole to remifentanil-treated neurons when compared with naive controls (gray open circles). Only 4 nM remifentanil-treated neurons demonstrated an increase in NMDA-evoked peak current compared with naive controls (\**P* < 0.001, two-way analysis of variance with Tukey posttest).

ceptor subtypes are activating a common or converging intracellular pathway leading to enhanced NMDA receptor function. Consequently, eliminating the activity of just one of these opioid receptor subtypes is sufficient to completely abolish downstream signaling to NMDA receptors.

*NMDA Receptor Enhancement Induced by the Selective δ-Opioid Agonist, DPDPE, Displays Similar Concentration Responses as Remifentanil*

To test whether δ-opioid receptor activation alone is sufficient to induce an enhancement of NMDA current, recordings were undertaken using selective δ-opioid agonists DPDPE at 4, 12, and 30 nM and deltorphin II at 4, 10, and 30 nM in place of remifentanil. Binding studies in cerebral cortex showed that deltorphin II has a higher binding affinity for δ-opioid receptors, with a  $K_d$  of  $0.82 \pm 0.07$  nM ( $B_{max} = 43.65 \pm 2.41$  fmol/mg protein), than DPDPE, with a  $K_d$  of  $2.72 \pm 0.21$  nM ( $B_{max} = 20.78 \pm 3.13$  fmol/mg protein).<sup>36</sup> Therefore, it was not surprising that 4 nM DPDPE did not enhance NMDA-evoked currents (*P* = 0.78), whereas 12 nM increased currents by a mean difference of 73.59% (*P* < 0.001) above controls (fig. 6), and 4 and 10 nM deltorphin II increased NMDA responses by 26.12% (*P* = 0.01) and 38.64% (*P* < 0.001) above controls (fig. 7). Interestingly, DPDPE and deltorphin II at 30 nM did not induce a significant enhancement of the NMDA responses (*P* = 1.00 and 0.87, respectively) showing similar concentration-response effects as remifentanil at 10 nM (fig. 6 and 7). Therefore, exposure of this subpopulation of DH neurons to selective δ-opioid agonists DPDPE and deltorphin II induced an enhancement of NMDA current with a difference in

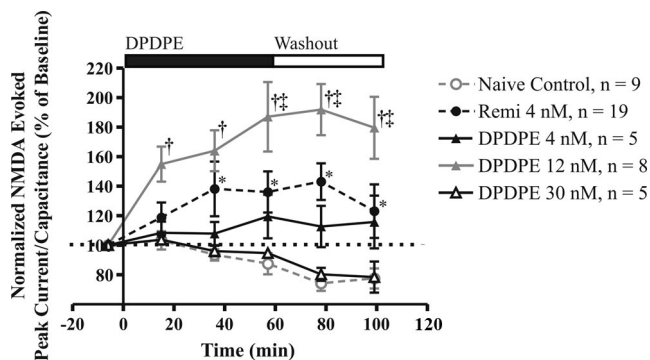

**Fig. 6.** *N*-Methyl-D-aspartate (NMDA)–evoked peak current amplitude per unit cell capacitance normalized to baseline responses during and after 4, 12, and 30 nM DPDPE treatments in dorsal horn neurons. There was a significant increase in NMDA-evoked current after 12 nM DPDPE treatment (gray closed triangles) (mean increase of 73.59%; †*P* < 0.001, two-way analysis of variance with Tukey posttest) from naive controls that was not observed for 4 nM DPDPE (black closed triangles) and 30 nM (black open triangles). Hence, DPDPE showed a similar concentration–response relation as that observed with remifentanil (figs. 2 and 3). The mean increase in NMDA-evoked current after 12 nM DPDPE treatment was significantly greater than with 4 nM remifentanil (Remi 4 nM; black closed circles) (‡*P* < 0.001, two-way analysis of variance with Tukey posttest). DPDPE = [D-Pen<sup>2</sup>, D-Pen<sup>5</sup>]enkephalin.

threshold concentrations that showed some consistency with binding data.<sup>36</sup> As well, the bell-shaped concentration–response relations were similar between DPDPE, deltorphin II, and remifentanil despite a difference in the magnitude of the NMDA current enhancement.

*NMDA Receptor Enhancement by the Selective δ-Opioid Agonist Deltorphin II Inhibits Remifentanil Effects*

It was postulated that the enhancement of NMDA receptor current after 4 nM remifentanil exposure is due

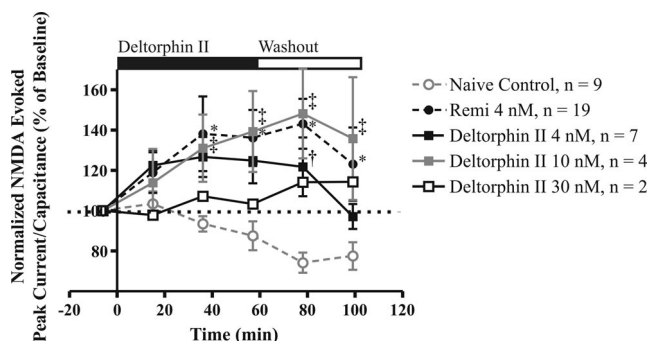

**Fig. 7.** *N*-Methyl-D-aspartate (NMDA)–evoked peak current amplitude per unit cell capacitance normalized to baseline responses during and after 4 nM deltorphin II (black closed squares), 10 nM deltorphin II (gray closed squares), and 30 nM deltorphin II (black open squares) treatments in dorsal horn neurons. There were significant increases in NMDA-evoked current after 4 nM deltorphin II (mean increase of 26.12%, *n* = 4) and 10 nM deltorphin II treatments (mean increase of 38.64%, *n* = 7), but not after 30 nM deltorphin II treatment, compared with naive controls (gray open circles) (†*P* < 0.05 and ‡*P* < 0.05, respectively, two-way analysis of variance with Tukey posttest). The increases of NMDA current with 10 nM deltorphin II were of similar magnitude as with 4 nM remifentanil (Remi 4 nM; black closed circles) compared with naive controls.

to the activation of  $\delta$ -opioid receptors *via* a similar pathway as deltorphin II (10 nM). The selected DH neurons were exposed to 10 nM deltorphin II for 40 min to induce NMDA-evoked current enhancement (mean increase of 38.64%; fig. 7) that was similar to or greater than with 4 nM remifentanyl alone (mean increase of 37.30%; fig. 2B). This 10 nM deltorphin II exposure was then followed by the addition of 4 nM remifentanyl to the 10 nM deltorphin II perfusion solution for a further 40 min in order to assess the ability of remifentanyl to further enhance the NMDA responses. Because of the greater enhancement of NMDA current with 12 nM DPDPE (mean increase of 73.59%; fig. 6), 10 nM deltorphin II was unlikely to have achieved a ceiling effect on NMDA current enhancement. Therefore, if 10 nM deltorphin II and 4 nM remifentanyl caused an augmentation of NMDA responses by different mechanisms, there would be an additive effect, whereas if their mechanisms of enhancement were convergent through a common pathway, one agonist effect would occlude the other. There were no further NMDA response increases with the addition of remifentanyl ( $P = 0.103$ , paired  $t$  test; figs. 8A and B), suggesting that remifentanyl and deltorphin II affected NMDA current through a common pathway.

## Discussion

In the current study, it was demonstrated that exposure to 4, 6, and 8 nM remifentanyl (fig. 2B), but not 1, 2, and 10 nM (figs. 3A and B), for 36 min caused a significant increase in NMDA-evoked peak current lasting throughout the 60-min drug application and 40-min washout periods. This enhancement of NMDA responses was attenuated by the application of either a  $\mu$ - or a  $\delta$ -opioid antagonist (figs. 4 and 5, respectively), suggesting that the concurrent activation of  $\mu$ - and  $\delta$ -opioid receptors by remifentanyl is required to increase NMDA-evoked current. However, exposure to selective  $\delta$ -opioid agonists DPDPE and deltorphin II alone were able to induce increases in NMDA receptor responses (figs. 6 and 7, respectively) with similar rank order potency as their binding affinity to the  $\delta$ -opioid receptor.<sup>36</sup> As well, DPPE and deltorphin II caused similar bell-shaped concentration-dependent changes in NMDA responses as remifentanyl (fig. 6). Deltorphin II at 10 nM occluded further NMDA current increases induced by 4 nM remifentanyl (fig. 8). These results suggest that remifentanyl causes the enhancement of NMDA responses through activation of  $\delta$ -opioid receptors and their associated intracellular pathways.

Two previous studies of remifentanyl effects on NMDA receptor function showed direct gating<sup>32</sup> and enhancement of NMDA receptor current.<sup>29</sup> One group of investigators<sup>32</sup> studied the effects of a very high concentration of remifentanyl (50  $\mu$ M) in recombinant human NR1-

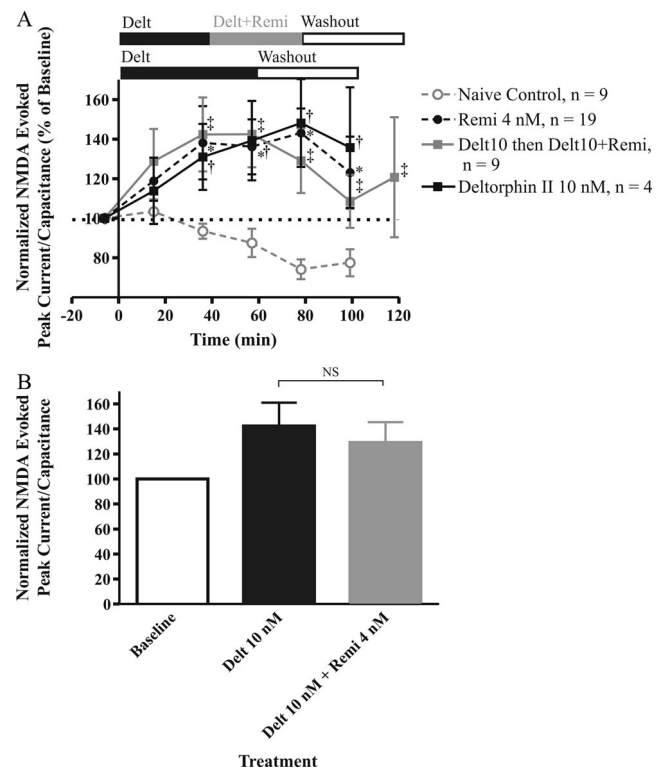

**Fig. 8.** (A) *N*-Methyl-D-aspartate (NMDA)-evoked peak current amplitude per unit cell capacitance normalized to baseline responses during and after 10 nM deltorphin II for 30 min followed by 10 nM deltorphin II with 4 nM remifentanyl for the following 30 min (Delt 10 then Delt 10 + Remi; gray closed squares). Remifentanyl at 4 nM alone (Remi 4 nM; black closed circles), 10 nM deltorphin II alone (black closed squares), and 10 nM deltorphin II followed by the addition of 4 nM remifentanyl (gray closed squares) enhanced NMDA current compared with naive controls (gray open circles) (\*  $P < 0.05$ , †  $P < 0.05$ , and ‡  $P < 0.05$ , respectively, two-way analysis of variance with Tukey posttest). (B) Bar graph representation of NMDA-evoked peak current normalized to cell capacitance and baseline after 30 min of 10 nM deltorphin II perfusion (Delt 10 nM; black bar) and after the subsequent 30 min of 10 nM deltorphin II with 4 nM remifentanyl (Delt 10 nM + Remi 4 nM; gray bar). There was no further enhancement of the NMDA responses with the addition of 4 nM remifentanyl after 10 nM deltorphin II pretreatment (not significant [NS],  $P = 0.103$ , paired  $t$  test).

NR2A-containing NMDA receptors. It showed that remifentanyl directly gated NMDA receptors; however, these results were probably due to the different functional properties of recombinant NMDA receptors concurrent with the incidental administration of a high concentration of 3 mM glycine present in the remifentanyl formulation. A second group of investigators<sup>29</sup> showed that 10  $\mu$ M remifentanyl together with 10  $\mu$ M glycine did not directly activate but potentiated NMDA 10  $\mu$ M-evoked current recorded in spinal cord slice. This concentration of remifentanyl is also relatively high and not likely clinically relevant. In contrast, the current study demonstrated that even at concentrations as low as 4 nM remifentanyl, there was a significant increase in 1 mM NMDA-evoked current. A saturating concentration of NMDA<sup>23</sup> was used to simulate a barrage of surgical nociceptive stimuli resulting in a high quantal release of

glutamate onto postsynaptic DH neurons. This may account for the differences in remifentanil concentration-responses between this and the other two previous studies, in that a common intracellular pathway activated by NMDA and opioid receptor activity may have become saturated or an inhibitory pathway initiated by relatively high concentrations of one of the agonists. Therefore, the concentration-response relationship for remifentanil-induced enhancement of NMDA receptor function may depend on the activity of NMDA receptors. The possible cooperativity between opioid and NMDA receptors requires further investigation.

In this study, the remifentanil-induced enhancement of NMDA-evoked peak current amplitude was shown to be concentration dependent and occurred at clinically relevant concentrations. Plasma concentrations achieved by remifentanil intravenous infusion at 0.05–0.3  $\mu\text{g} \cdot \text{kg}^{-1} \cdot \text{min}^{-1}$  are between 1.5 and 8 ng/ml (4.14–22.08 nM).<sup>9,37</sup> Therefore, 4- to 8-nM concentrations of remifentanil in the spinal fluid would be found with venous plasma concentrations of 5.41–10.81 nM (calculated based on previously determined cerebrospinal:venous compartmentalization of remifentanil<sup>11</sup>). Therefore, spinal fluid concentrations of remifentanil required for the enhancement of NMDA receptor responses are achieved with intravenous infusions of relatively low doses of remifentanil ranging from 0.1 to 0.2  $\mu\text{g} \cdot \text{kg}^{-1} \cdot \text{min}^{-1}$ . Thus, the effects of remifentanil on NMDA receptor-mediated responses observed at concentrations of 4, 6, and 8 nM are clinically relevant.

The concentration-response for remifentanil enhancement of NMDA current is unusual in that effects are only observed at 4, 6, and 8 nM but not at lower or higher concentrations. A similar concentration-response relation was observed with the selective  $\delta$ -opioid agonists DPDPE and deltorphin II. With DPDPE, 4 and 30 nM did not result in NMDA current increases, but the intermediate concentration 12 nM enhanced NMDA peak current by 73.59% (twofold more than 4 nM remifentanil). With deltorphin II, 4 nM and 10 nM resulted in enhancement of NMDA peak current by 26.12% and 38.64%, respectively ( $P = 0.023$  and  $P = 0.002$ ), whereas 30 nM did not increase NMDA responses. The authors are unaware of any studies where concentration-responses have been studied for remifentanil in this context and, therefore, view this as a novel observation that is likely attributable to the activation of  $\delta$ -opioid receptors. Presumably, at lower concentrations of remifentanil, the threshold for enhancement of NMDA receptor function has not been reached. However, currently, the failure of higher remifentanil, DPDPE, and deltorphin II concentrations to enhance NMDA responses is unexplained. It is possible that higher opioid agonist concentrations are more likely to increase (1)  $\delta$ -opioid receptor desensitization<sup>38</sup>; (2) recruitment of dephosphorylating enzymes<sup>39</sup> that counter the effects of  $\delta$ -opioid receptor activation; or (3) activa-

tion of a competing pathway, e.g., through other associated G-protein subtypes.<sup>40</sup> As mentioned previously, the coactivation of NMDA receptors may also contribute to this possibly by activating a common second messenger protein (e.g., PKC) as opioid receptors.

The time-dependent enhancement of NMDA current by remifentanil is relevant to the acute development of OIH or tolerance.<sup>2–37</sup> This correlation of *in vitro* and *in vivo* effects suggests that the remifentanil-induced changes are due to the recruitment of intracellular processes that operate on relatively rapid time scales, within 36 min. These processes may include NMDA receptor phosphorylation, e.g., by PKC,<sup>16,41,42</sup> or transport of subsynaptic NMDA receptors to the cell surface.<sup>43</sup> Opioid receptor phosphorylation, arrestin binding, and uncoupling of G-protein activation resulting in receptor desensitization have been shown to occur within 10 min in some instances.<sup>38,44</sup> Others, such as gene induction, superactivation of adenylyl cyclase, and accumulation of cyclic adenosine monophosphate,<sup>44</sup> may play less of a role. Although the duration of electrophysiologic experiments reported here was limited by the occurrence of cellular dysfunction or demise after approximately 120 min, the persistence of NMDA response enhancement above control levels for the duration of the recording interval was demonstrated. The enhancement of NMDA-evoked current was maintained even after 40 min of remifentanil washout, suggesting a lasting effect of possibly hours, correlating with the clinical experience.<sup>2–4</sup>

Analgesic effects of endogenous and exogenous opioids, such as remifentanil, are due to the activation of pertussis toxin (PTX)-sensitive  $G_{i/o}$  protein-coupled opioid receptors that are classified into  $\mu$ ,  $\kappa$ , and  $\delta$  subtypes. All three types are expressed in the brain and spinal cord and are expressed on the cell surface in pairs as homodimers or heterodimers.<sup>45</sup> Activations of  $\mu$ - and  $\delta$ -opioid receptors, but not  $\kappa$ -opioid receptors, have been implicated in the development of OIH,<sup>34</sup> possibly because of their effect on a common subset of intracellular G proteins.<sup>35</sup> Activation of  $\mu$ -opioid receptors by morphine increases the expression of  $\delta$ -opioid receptors on cellular surfaces,<sup>46</sup> thus increasing the probability for these subtypes to interact. In addition, the pharmacologic inhibition and genetic attenuation of  $\delta$ -opioid receptors has been shown to enhance  $\mu$ -opioid receptor spinal antinociception and eliminate morphine tolerance development in animals.<sup>46</sup> The demonstration that increases in NMDA current result from  $\delta$ -opioid receptor activation in a subpopulation of cultured DH neurons suggests that  $\delta$ -opioid receptors play a role in the development of acute OIH and tolerance by this mechanism. Therefore,  $\delta$ -opioid receptor inhibition may play a role in attenuating acute remifentanil tolerance, as well as in eliminating chronic morphine tolerance.<sup>46</sup>

The observation that 1  $\mu\text{M}$  DAMGO activation of  $\mu$ -opioid receptors caused an enhancement of NMDA recep-



tor current in DH neurons was initially made by Chen *et al.*<sup>16,17</sup> DAMGO at 1  $\mu\text{M}$  is also active at  $\delta$ -opioid receptors,<sup>18</sup> and the current study showed that the selective activation of  $\delta$ -opioid receptors enhanced NMDA receptor function. Chen *et al.* also demonstrated that the consequent increase in intracellular PKC from opioid receptor activation caused a reduction in the physiologic  $\text{Mg}^{2+}$  block of the NMDA receptor, thereby increasing NMDA current amplitude. The mechanism of NMDA receptor enhancement by  $\delta$ -opioid receptor activation is not known but may also involve the increase in PKC activity. However, due to the lack of extracellular  $\text{Mg}^{2+}$  in these experiments, it is unlikely that the mechanism of PKC action on the NMDA receptor is the reduction of the physiologic  $\text{Mg}^{2+}$  block. Therefore, it is unknown which G protein-dependent/independent pathways are initiated after  $\delta$ -opioid receptor activation to bring about increases in NMDA receptor function.

There is some evidence that both  $\mu$ - and  $\delta$ -opioid receptors play a role in the development of OIH and tolerance.<sup>16-18,34,35,46</sup> These two subtypes of opioid receptors colocalize in the superficial dorsal layers of the spinal cord<sup>47</sup> and exist as homodimers or heterodimers.<sup>48,49</sup> Heterodimers formed by  $\mu$ - and  $\delta$ -opioid receptors have been found in native spinal cord neuronal tissue<sup>50</sup> and have unique properties.<sup>49,51,52</sup> These unique properties include their selectivity for the  $\delta$ -agonist deltorphin II (albeit at a lower binding affinity than to  $\delta/\delta$  receptors<sup>51</sup>) rather than DPDPE, and coupling to PTX-insensitive  $G_\alpha$  proteins of the  $G_z$  subtype.<sup>51,52</sup> Homodimers of  $\mu$ - and  $\delta$ -opioid receptors activate  $G_{i/o}$  protein subtypes that are PTX sensitive,<sup>51</sup> but in a minority of neurons, they activate cholera toxin-sensitive  $G_s$  proteins, which presumably mediate the cellular processes that can also underlie hyperalgesia.<sup>53</sup> Preliminary unpublished data from this laboratory are inconclusive for determining whether  $\mu/\delta$ -heterodimeric opioid receptors coupled to  $G_z$  proteins or  $\mu/\mu$ - or  $\delta/\delta$ -homodimeric opioid receptors coupled to  $G_s$  proteins are responsible for the observed increases in NMDA responses after remifentanyl exposure. A 24-h 1- $\mu\text{g}/\text{ml}$  PTX (inhibiting  $G_{i/o}$  but not  $G_z$  proteins) or 5- $\mu\text{g}/\text{ml}$  cholera toxin A + B (inhibiting  $G_s$  proteins) pretreatment of the DH neurons before electrophysiologic recording led to the enhancement of NMDA receptor current in the absence of remifentanyl or an opioid agonist (data not shown; figs. 2 and 3 on the ANESTHESIOLOGY Web site at <http://www.anesthesiology.org>). However, the NMDA receptor up-regulation by PTX correlated directly with animal hyperalgesia and allodynia after intrathecal PTX injection.<sup>54,55</sup> Unfortunately, the G-protein subtype that is activated and ultimately leads to NMDA receptor up-regulation remains unknown.

Therefore, our experimental model presents a cellular mechanism involving the rapid and prolonged up-regulation of NMDA receptor function by remifentanyl which

may contribute to the clinical development of remifentanyl hyperalgesia and tolerance. The concentration dependence, time course, and  $\delta$ -opioid receptor involvement in the remifentanyl-induced NMDA response enhancement have been shown in these experiments. These results support the validity of this model in which NMDA receptor function enhancement in DH neurons corresponds well with the development of pathologic pain. Furthermore, opioid-induced pathologic pain as shown by increased NMDA receptor responses to remifentanyl can develop rapidly and run a protracted course even at clinical concentrations. Therefore, this model can be used in future studies to define the mechanism for  $\delta$ -opioid receptor-induced increases in NMDA receptor function. More importantly, results of this study support a role for  $\delta$ -opioid receptor inhibition in the elimination of rapid NMDA receptor enhancement and the attenuation of acute OIH and tolerance development.

The authors thank Michael Jackson, Ph.D., and Loren Martin, Ph.D. (Postdoctoral Fellows, Department of Physiology, University of Toronto, Toronto, Ontario, Canada), and Beverley Orser, M.D., Ph.D., F.R.C.P.(C.) (Professor, Departments of Physiology and Anesthesia, University of Toronto), for reviewing and advising on the manuscript.

## References

- Hood DD, Curry R, Eisenach JC: Intravenous remifentanyl produces withdrawal hyperalgesia in volunteers with capsaicin-induced hyperalgesia. *Anesth Analg* 2003; 97:810-5
- Henneberg SW, Rosenborg D, Weber JE, Ahn P, Burgdorff B, Thomsen LL: Perioperative depth of anaesthesia may influence postoperative opioid requirements. *Acta Anaesthesiol Scand* 2005; 49:293-6
- Guignard B, Bossard AE, Coste C, Sessler DI, Lebrault C, Alfonsi P, Fletcher D, Chauvin M: Acute opioid tolerance: Intraoperative remifentanyl increases postoperative pain and morphine requirement. *ANESTHESIOLOGY* 2000; 93:409-17
- Joly V, Richebe P, Guignard B, Fletcher D, Maurette P, Sessler DI, Chauvin M: Remifentanyl-induced postoperative hyperalgesia and its prevention with small-dose ketamine. *ANESTHESIOLOGY* 2005; 103:147-55
- Koppert W, Angst M, Alsheimer M, Sittl R, Albrecht S, Schuttler J, Schmelz M: Naloxone provokes similar pain facilitation as observed after short-term infusion of remifentanyl in humans. *Pain* 2003; 106:91-9
- Angst MS, Koppert W, Pahl I, Clark DJ, Schmelz M: Short-term infusion of the  $\mu$ -opioid agonist remifentanyl in humans causes hyperalgesia during withdrawal. *Pain* 2003; 106:49-57
- Koppert W, Sittl R, Scheuber K, Alsheimer M, Schmelz M, Schuttler J: Differential modulation of remifentanyl-induced analgesia and postinfusion hyperalgesia by S-ketamine and clonidine in humans. *ANESTHESIOLOGY* 2003; 99:152-9
- Scott LJ, Perry CM: Remifentanyl: A review of its use during the induction and maintenance of general anaesthesia. *Drugs* 2005; 65:1793-823
- Glass PS, Hardman D, Kamiyama Y, Quill TJ, Marton G, Donn KH, Grosse CM, Hermann D: Preliminary pharmacokinetics and pharmacodynamics of an ultra-short-acting opioid: Remifentanyl (G187084B). *Anesth Analg* 1993; 77:1031-40
- Zhang Y, Irwin MG, Wong TM, Chen M, Cao CM: Remifentanyl preconditioning confers cardioprotection *via* cardiac  $\kappa$ - and  $\delta$ -opioid receptors. *ANESTHESIOLOGY* 2005; 102:371-8
- Kabbaj M, Vachon P, Varin F: Impact of peripheral elimination on the concentration-effect relationship of remifentanyl in anesthetized dogs. *Br J Anaesth* 2005; 94:357-65
- Trujillo KA: Are NMDA receptors involved in opiate-induced neural and behavioral plasticity? A review of preclinical studies. *Psychopharmacology (Berl)* 2000; 151:121-41
- Woolf CJ, Salter MW: Neuronal plasticity: Increasing the gain in pain. *Science* 2000; 288:1765-9
- Mao J, Mayer DJ: Spinal cord neuroplasticity following repeated opioid exposure and its relation to pathological pain. *Ann N Y Acad Sci* 2001; 933:175-84
- Pasternak GW, Kolesnikov YA, Babey AM: Perspectives on the N-methyl-D-aspartate/nitric oxide cascade and opioid tolerance. *Neuropsychopharmacology* 1995; 13:309-13
- Chen L, Huang LY: Sustained potentiation of NMDA receptor-mediated

- glutamate responses through activation of protein kinase C by a mu opioid. *Neuron* 1991; 7:319-26
17. Chen L, Huang LY: Protein kinase C reduces Mg<sup>2+</sup> block of NMDA-receptor channels as a mechanism of modulation. *Nature* 1992; 356:521-3
  18. Martin NA, Prather PL: Interaction of co-expressed mu- and delta-opioid receptors in transfected rat pituitary GH(3) cells. *Mol Pharmacol* 2001; 59:774-83
  19. Keith DE, Anton B, Murray SR, Zaki PA, Chu PC, Lissin DV, Monteillet-Agius G, Stewart PL, Evans CJ, von Zastrow M:  $\mu$ -Opioid receptor internalization: Opiate drugs have differential effects on a conserved endocytic mechanism *in vitro* and in the mammalian brain. *Mol Pharmacol* 1998; 53:377-84
  20. Sternini C, Spann M, Anton B, Keith DE Jr, Bunnett NW, von Zastrow M, Evans C, Brecha NC: Agonist-selective endocytosis of mu opioid receptor by neurons *in vivo*. *Proc Natl Acad Sci U S A* 1996; 93:9241-6
  21. Keith DE, Murray SR, Zaki PA, Chu PC, Lissin DV, Kang L, Evans CJ, von Zastrow M: Morphine activates opioid receptors without causing their rapid internalization. *J Biol Chem* 1996; 271:19021-4
  22. Liao D, Lin H, Law PY, Loh HH: Mu-opioid receptors modulate the stability of dendritic spines. *Proc Natl Acad Sci U S A* 2005; 102:1725-30
  23. Zhao M, Joo DT: Subpopulation of dorsal horn neurons displays enhanced N-methyl-D-aspartate receptor function after chronic morphine exposure. *ANESTHESIOLOGY* 2006; 104:815-25
  24. Portera-Cailliau C, Price DL, Martin LJ: N-methyl-D-aspartate receptor proteins NR2A and NR2B are differentially distributed in the developing rat central nervous system as revealed by subunit-specific antibodies. *J Neurochem* 1996; 66:692-700
  25. Meguro H, Mori H, Araki K, Kushiya E, Kutsuwada T, Yamazaki M, Kumanishi T, Arakawa M, Sakimura K, Mishina M: Functional characterization of a heteromeric NMDA receptor channel expressed from cloned cDNAs. *Nature* 1992; 357:70-4
  26. Monyer H, Sprengel R, Schoepfer R, Herb A, Higuchi M, Lomeli H, Burnashev N, Sakmann B, Seeburg PH: Heteromeric NMDA receptors: Molecular and functional distinction of subtypes. *Science* 1992; 256:1217-21
  27. Flint AC, Maisch US, Weishaupt JH, Kriegstein AR, Monyer H: NR2A subunit expression shortens NMDA receptor synaptic currents in developing neocortex. *J Neurosci* 1997; 17:2469-76
  28. Qian A, Johnson JW: Channel gating of NMDA receptors. *Physiol Behav* 2002; 77:577-82
  29. Guntz E, Dumont H, Roussel C, Gall D, Dufresne F, Cuvelier L, Blum D, Schiffmann SN, Sosnowski M: Effects of remifentanil on N-methyl-D-aspartate receptor: An electrophysiologic study in rat spinal cord. *ANESTHESIOLOGY* 2005; 102:1235-41
  30. Nong Y, Huang YQ, Ju W, Kalia LV, Ahmadian G, Wang YT, Salter MW: Glycine binding primes NMDA receptor internalization. *Nature* 2003; 422:302-7
  31. Mody I, Salter MW, MacDonald JF: Requirement of NMDA receptor/channels for intracellular high-energy phosphates and the extent of intraneuronal calcium buffering in cultured mouse hippocampal neurons. *Neurosci Lett* 1988; 93:73-8
  32. Hahnenkamp K, Nollet J, Van Aken HK, Buerkle H, Halene T, Schauerer S, Hahnenkamp A, Hollmann MW, Strumper D, Durieux ME, Hoemann CW: Remifentanil directly activates human N-methyl-D-aspartate receptors expressed in *Xenopus laevis* oocytes. *ANESTHESIOLOGY* 2004; 100:1531-7
  33. Sattler R, Charlton MP, Hafner M, Tymianski M: Distinct influx pathways, not calcium load, determine neuronal vulnerability to calcium neurotoxicity. *J Neurochem* 1998; 71:2349-64
  34. Towett PK, Kanui TI, Juma FD: Stimulation of mu and delta opioid receptors induces hyperalgesia while stimulation of kappa receptors induces antinociception in the hot plate test in the naked mole-rat (*Heterocephalus glaber*). *Brain Res Bull* 2006; 71:60-8
  35. Alt A, Clark MJ, Woods JH, Traynor JR: Mu and delta opioid receptors activate the same G proteins in human neuroblastoma SH-SY5Y cells. *Br J Pharmacol* 2002; 135:217-25
  36. Kim KW, Kim SJ, Shin BS, Choi HY: Ligand binding profiles of delta-opioid receptor in human cerebral cortex membranes: Evidence of delta-opioid receptor heterogeneity. *Life Sci* 2001; 68:1649-56
  37. Dershwitz M, Randel GI, Rosow CE, Fragen RJ, Connors PM, Librojo ES, Shaw DL, Peng AW, Jamerson BD: Initial clinical experience with remifentanil, a new opioid metabolized by esterases. *Anesth Analg* 1995; 81:619-23
  38. Marie N, Aguila B, Allouche S: Tracking the opioid receptors on the way of desensitization. *Cell Signal* 2006; 18:1815-33
  39. Koch T, Brandenburg LO, Liang Y, Schulz S, Beyer A, Schroder H, Holtt V: Phospholipase D2 modulates agonist-induced mu-opioid receptor desensitization and resensitization. *J Neurochem* 2004; 88:680-8
  40. Gintzler AR, Chakrabarti S: Post-opioid receptor adaptations to chronic morphine: Altered functionality and associations of signaling molecules. *Life Sci* 2006; 79:717-22
  41. Lu WY, Xiong ZG, Lei S, Orser BA, Dudek E, Browning MD, MacDonald JF: G-protein-coupled receptors act *via* protein kinase C and Src to regulate NMDA receptors. *Nat Neurosci* 1999; 2:331-8
  42. Liao GY, Wagner DA, Hsu MH, Leonard JP: Evidence for direct protein kinase-C mediated modulation of N-methyl-D-aspartate receptor current. *Mol Pharmacol* 2001; 59:960-4
  43. Lan JY, Skeberdis VA, Jover T, Grooms SY, Lin Y, Araneda RC, Zheng X, Bennett MV, Zukin RS: Protein kinase C modulates NMDA receptor trafficking and gating. *Nat Neurosci* 2001; 4:382-90
  44. Williams JT, Christie MJ, Manzoni O: Cellular and synaptic adaptations mediating opioid dependence. *Physiol Rev* 2001; 81:299-343
  45. Levac BA, O'dowd BF, George SR: Oligomerization of opioid receptors: Generation of novel signaling units. *Curr Opin Pharmacol* 2002; 2:76-81
  46. Zhang X, Bao L, Guan JS: Role of delivery and trafficking of delta-opioid peptide receptors in opioid analgesia and tolerance. *Trends Pharmacol Sci* 2006; 27:324-9
  47. Arvidsson U, Riedl M, Chakrabarti S, Lee JH, Nakano AH, Dado RJ, Loh HH, Law PY, Wessendorf MW, Elde R: Distribution and targeting of a mu-opioid receptor (MOR1) in brain and spinal cord. *J Neurosci* 1995; 15:3328-41
  48. George SR, Fan T, Xie Z, Tse R, Tam V, Varghese G, O'dowd BF: Oligomerization of mu- and delta-opioid receptors: Generation of novel functional properties. *J Biol Chem* 2000; 275:26128-35
  49. Gomes I, Jordan BA, Gupta A, Trapaidze N, Nagy V, Devi LA: Heterodimerization of mu and delta opioid receptors: A role in opiate synergy. *J Neurosci* 2000; 20:RC110
  50. Gomes I, Gupta A, Filipovska J, Szeto HH, Pintar JE, Devi LA: A role for heterodimerization of mu and delta opiate receptors in enhancing morphine analgesia. *Proc Natl Acad Sci U S A* 2004; 101:5135-9
  51. Fan T, Varghese G, Nguyen T, Tse R, O'dowd BF, George SR: A role for the distal carboxyl tails in generating the novel pharmacology and G protein activation profile of mu and delta opioid receptor hetero-oligomers. *J Biol Chem* 2005; 280:38478-88
  52. Law PY, Erickson-Herbrandson LJ, Zha QQ, Solberg J, Chu J, Sarre A, Loh HH: Heterodimerization of mu- and delta-opioid receptors occurs at the cell surface only and requires receptor-G protein interactions. *J Biol Chem* 2005; 280:11152-64
  53. Crain SM, Shen KF: Antagonists of excitatory opioid receptor functions enhance morphine's analgesic potency and attenuate opioid tolerance/dependence liability. *Pain* 2000; 84:121-31
  54. Wen ZH, Chang YC, Wong CS: Implications of intrathecal pertussis toxin animal model on the cellular mechanisms of neuropathic pain syndrome. *Acta Anaesthesiol Sin* 2003; 41:187-96
  55. Womer DE, DeLapp NW, Shannon HE: Intrathecal pertussis toxin produces hyperalgesia and allodynia in mice. *Pain* 1997; 70:223-8
